# Supplementary material
Source: publisher site journal article supplement (http://kjim.org/upload/media/kjim-2019-270-suppl5.pdf)
Supplement: Supplementary file 1 [file kjim-2019-270-suppl5.pdf]

**Supplementary Table 4. Correlation of ROR2 levels with BAL fluid cell and lung function profiles in IPF**

| Correlation           | No. | ROR2                    |         |
|-----------------------|-----|-------------------------|---------|
|                       |     | Correlation coefficient | p value |
| Macrophage            | 84  | -0.140                  | 0.206   |
| Lymphocyte            | 84  | -0.160                  | 0.147   |
| Neutrophil            | 84  | -0.123                  | 0.265   |
| Eosinophil            | 84  | -0.121                  | 0.272   |
| FVC%                  | 84  | -0.107                  | 0.331   |
| FEV <sub>1</sub> %    | 84  | -0.089                  | 0.419   |
| dFVC%/yr <sup>a</sup> | 84  | -0.145                  | 0.188   |
| DLCO%                 | 84  | 0.037                   | 0.741   |

ROR2, receptor tyrosine kinase-like orphan receptor 2; BAL, bronchoalveolar lavage; IPF, idiopathic pulmonary fibrosis; FVC, forced vital capacity; FEV<sub>1</sub>, forced expiratory value; DLCO, diffusing capacity of the lungs for carbon monoxide

<sup>a</sup>dFVC%/yr: annual rate of FVC decline was calculated as follows: (last FVC – baseline FVC)/baseline FVC/yr. Correlations between ROR2 levels with clinical outcomes were examined using Spearman's correlation coefficient analyses.
